# Supplementary material for: High photovoltaic performance (23.75) of triazatruxene-based dye-sensitized solar cells containing different π bridges: computational investigation
Source: Royal Society of Chemistry journal article supplement (doi:10.1039/d3nj00371j), 2023-01-01
Supplement: d3nj00371j1.pdf [file d3nj00371j1.pdf]

## SUPPORTING INFORMATION

### Methods

#### Theoretical models

To attain high energy-conversion efficiency, the excited electron and hole pairs should dissociate into separate positive and negative charges to escape from recombination due to the coulombic attraction. To achieve this process, the binding energy must be overcome. That is, the dye molecule should possess less exciton binding energy for high-energy conversion. Here, the exciton binding energy was calculated using the formula[1,2]:

$$E_b = IP - EA - E_{opt\ gap} \quad (1)$$

$$IP = -E_{HOMO} \quad (2)$$

$$EA = -E_{LUMO} \quad (3)$$

where  $IP$  is ionization energy,  $EA$  is electron affinity energy and  $E_{opt\ gap}$  is the excitation energy.

To understand the influencing factors of  $J_{SC}$ , one calculated the time of electron injection. The charge separation process of the sensitizer can be estimated by the Newns-Anderson model[3]. When the excited state adsorbate interacts with the energy band of a semicontinuous base semiconductor ( $TiO_2$ ), its energy obeys the following Lorentzian distribution[4]:

$$L_{LUMO}(E) = \frac{1}{\pi} \frac{\left(\frac{\hbar\Gamma}{2}\right)}{(E - E_{LUMO(ads)})^2 + \left(\frac{\hbar\Gamma}{2}\right)^2} \quad (4)$$

The broadening width  $\hbar\Gamma$  is derived from the mean deviation of the LUMO (adsorbate) levels, which is evaluated as follows[5]:

$$\hbar\Gamma = \sum_i p_i |\varepsilon_i - E_{LUMO(ads)}| \quad (5)$$

The  $E_{LUMO(ads)}$  of dye's LUMO level after adsorption in eq 12 is characterized by

$$E_{LUMO(ads)} = \sum_i p_i \varepsilon_i \quad (6)$$

$$p_i = \frac{\sum_{i \in ads} (c_{ij}^A)^2}{\sum_{i \in ads@TiO_2} (c_{ij}^A)^2} \quad (7)$$

where  $p_i$  is the percentage (%) of the electron distribution on the adsorbate in the  $i$ -th non-occupied molecular orbital of the dye molecule;  $\varepsilon_i$  is the energy level (eV) of the  $i$ -th non-occupied molecular orbital of the dye molecule. Therefore, the photogenerated electron injection time can be calculated by the following formula:

$$\tau(fs) = \frac{658}{\hbar\Gamma} \quad (8)$$

To further estimate  $J_{SC}$ , one calculated the lifetime ( $\tau_1$ ) of the first excited state ( $S_1$ ). Value of  $\tau_1$  is one of the important factors affecting the efficiency of electron transfer [6], which can be expressed by the following formula[7,8]:

$$\tau_1 = \frac{1.499}{f_1 \cdot E^2} \quad (9)$$

where  $E$  is the excitation energy of the first excited state ( $cm^{-1}$ ) and  $f_1$  is the oscillator strength.

At the same time, the fluorescence lifetime ( $\tau_2$ ) is an important factor affecting charge recombination[9]:

$$\tau_2 = \frac{a \cdot c^3 \cdot u^2}{2 \cdot f_2 \cdot e_2^2} \quad (10)$$

where  $c$  is the speed of light,  $f_2$  is the oscillator strength in the fluorescence state, and  $e_2$  is the fluorescence energy.

To quantitatively describe the molecular TIC process, one calculated the parameters  $D_{CT}$ ,  $S_r$ ,  $\Delta r$ , and  $E_c$  for the dye@ $TiO_2$  model; these parameters can be obtained from the following formula[10–12]:

$$D_{CT} = \sqrt{|X_e - X_h|^2 + |Y_e - Y_h|^2 + |Z_e - Z_h|^2} \quad (11)$$

$$S_r = \int S_r d(r) = \int \sqrt{\rho_{(r)}^{hole} \rho_{(r)}^{ele}} d(r) \quad (12)$$

$$\Delta r = \frac{\sum_{ij} (K_i^j)^2 [\langle \varphi_j | r | \varphi_j \rangle - \langle \varphi_i | r | \varphi_i \rangle]}{\sum_{ij} (K_i^j)^2} \quad (13)$$

$$E_c = \frac{e^2}{4\pi\epsilon_0\epsilon_r} \iint \frac{\rho_h(\vec{r}_1)\rho_e(\vec{r}_2)}{|\vec{r}_1 - \vec{r}_2|} d^3\vec{r}_1 d^3\vec{r}_2 \quad (14)$$

where  $D_{CT}$  is the charge transferred distance between hole and electron centroids;  $X$ ,  $Y$ , and  $Z$  represent three-dimensional directions.  $X_e$  and  $X_h$  represent the density of charges at a specific orientation, such as  $X_e = \int x\rho_e(r)dr$  for electrons and  $X_h = \int x\rho_h(r)dr$  for holes, respectively. The  $S_r$  index characterizes the overlap extent of the hole and electron, where  $\rho_{(r)}^{hole}$  and  $\rho_{(r)}^{ele}$  are the density distributions of holes and electrons.  $\Delta r$  represents the length of charge transfer during electronic excitation.  $E_c$  is the Coulomb attraction,  $e$  and  $\epsilon_0$  are the elementary charge and vacuum dielectric constant, respectively.

In addition, the power conversion efficiency ( $\eta$ ) of solar cell is quantified using the following formula:

$$PCE = \frac{V_{oc}J_{SC}FF}{P_{inc}} \quad (15)$$

Where  $V_{oc}$  is the open-circuit voltage,  $J_{SC}$  is the short-circuit current density,  $FF$  is the fill factor, and  $P_{inc}$  is the input power of incident solar light (taking the measurement value of  $100 \text{ mW cm}^{-2}$ ).

In general,  $J_{SC}$  largely depends on the light-harvesting ability including the optical absorption region and intensity of the dye, which can be evaluated using the following equation[13–18]:

$$J_{SC} = e \int \frac{I_S(\lambda)}{E(\lambda)} LHE(\lambda) \phi_{inj} \eta_{coll} d\lambda \quad (16)$$

where  $e$  is defined as unit charge;  $LHE(\lambda)$  represents the light absorption efficiency;  $\phi_{inj}$  and  $\eta_{coll}$  present electron injection and collection efficiency; and  $I_S(\lambda)$  is the photon flux under AM1.5 G solar spectrum irradiation;  $E(\lambda)$  is the energy of a single photon with wavelength  $\lambda$ , calculated by  $1240/\lambda \text{ (m)}$  [19]. The definition of  $LHE(\lambda)$  is the following[20–23]:

$$LHE(\lambda) = 1 - 10^{-\Gamma\sigma(\lambda)} \quad (17)$$

$$\sigma(\lambda) = \varepsilon(\lambda) \times 10^3 \quad (18)$$

where  $\Gamma$  is the molecular adsorption value on the surface of the semiconductor ( $mol \cdot cm^{-2}$ ), and according to the experimental reference, all molecular adsorption values based on R of  $5.2 \times 10^{-8} mol/cm^2$  where used as a reference;  $\sigma(\lambda)$  stands for molecular absorption cross-section ( $cm^2 \cdot mol^{-1}$ ) and  $\varepsilon(\lambda)$  is the molar absorption coefficient [24,25]. The electron injection and electron composited efficiency can be determined as[25]:

$$\phi_{inj} = \frac{1}{1 + \frac{\tau_{inj}}{\tau_{relax}}} \quad (19)$$

$$\eta_{coll} = \frac{1}{1 + \frac{\tau_{trans}}{\tau_{rec}}} \quad (20)$$

Where  $\tau_{inj}$  is the required electron injection time of the dye to the TiO<sub>2</sub> surface based on Marcus' theory[10,25], and  $\tau_{relax}$  is the relaxation lifetime from the experiment (10 ps)[10,25,26];  $\tau_{trans}$  is the electron transfer time from TiO<sub>2</sub> to the redox couple (5 ps)[25], and  $\tau_{rec}$  is the attenuation time. Based on the Marcus theory, all investigated molecules have relative longer recombination time, and the obtained all molecular  $\eta_{coll}$  is tending to 1.

According to Marcus' theory, the injection time  $\tau_{inj}$  and the electron injection rate  $K_{inject}$  is given by the following two relations[27,28]:

$$\tau_{inj} = \frac{10^{12}}{K_{inject}} \quad (21)$$

$$K_{inject} = \sqrt{\frac{\pi}{\hbar^2 \lambda_{tot} K_B T}} \exp\left(\frac{-\beta r_{inj}}{A}\right) \exp\left[\frac{-(-\Delta G^\circ + \lambda_{tot})^2}{4\lambda K_B T}\right] \quad (22)$$

where  $\Delta G^\circ$  is the driving force for the reaction of electrons injection;  $\lambda_{tot}$  is the total recombination energy;  $r_{inj}$  is the distance between the cyanoacrylic acid and the surface of TiO<sub>2</sub>;  $\hbar$  is the Planck constant,  $\beta$  is the attenuation parameter (0.7)[10,25]; A is a fixed value [25], and  $K_B T$  is thermal energy (0.025852 eV). The parameters are obtained using the following equations :

$$\Delta G^\circ = E_{LUMO} - E_{CBM} \quad (23)$$

$$\lambda_{tot} = [E_0^+ - E_+^+] + [E_+^0 - E_0] + [E_0^- - E_-^-] + [E_-^0 - E_0] \quad (24)$$

where  $E_{LUMO}$  is the *LUMO* energy of the dye, and  $E_{CBM}$  is the simulated conduction band minimum of titanium dioxide, and  $E_0$  is the neutral molecule's energy in the ground state, and  $E_0^+/E_0^-$  is the cation (anion)'s energy with the geometry of the neutral molecule, and  $E_+^+/E_-^-$  is the energy of the cationic (anionic) optimized under the cationic (anionic) structure, and  $E_+^0/E_-^0$  is the neutral's energy with the geometry of the cationic (anionic) state.

The  $V_{oc}$  is determined by the difference between the quasi-Fermi level of the semiconductor ( $E_{F, TiO_2}$ ) and the redox potential of the redox couple ( $E_{redox}$ )[18].

The  $V_{oc}$  can be obtained by the following formula[23,29–33]:

$$V_{oc} = E_{F, TiO_2} - E_{redox} = \frac{1}{e} \left[ E_{CB} + \Delta E_{CB} - E_{redox} + K_B T \ln \left( \frac{n_c}{N_{CB}} \right) \right] \quad (25)$$

$$\Delta E_{CB} = \frac{-e\mu_{normal}\gamma}{\varepsilon\varepsilon'} \quad (26)$$

Where  $e$  is the unit charge,  $E_{CB}$  is the conduction band energy level of the semiconductor (–4.0 eV),  $\Delta E_{CB}$  is the displacement of the energy level of the conduction band[28,32,33],  $E_{redox}$  is the electrolyte ( $I^-/I_3^-$ ) level (–4.8 eV),  $K_B T$  is thermal energy (0.025852 eV),  $n_c$  is the electron number in the conduction band [25,31],  $N_{CB}$  is the electron density of state ( $7 \times 10^{20} \text{ cm}^{-3}$ )[10,25,31];  $\varepsilon$  and  $\varepsilon'$  are the dielectric constant of the organic monolayer and the dielectric constant of the vacuum, respectively;  $\mu_{normal}$  is the dipole moment component perpendicular to the direction of  $TiO_2$  surface; and  $\gamma$  is the concentration of surface.  $\Delta E_{CB}$  can be calculated by the difference between the intersections of the  $TiO_2$  PDOS and pure  $TiO_2$  DOS lines on the energy axis[34,35].

According to the current density-voltage properties of solar cells, the I-V curve can be depicted in the presence of known JSC and  $V_{oc}$ [10,17,18,25,25,36,37]:

$$I = J_{sc} - I_S \left( \exp \left( \frac{eV}{K_B T} \right) - 1 \right) \quad (27)$$

$$I_S = \frac{J_{sc}}{\exp(eV_{oc}/K_B T) - 1} \quad (28)$$

$$FF = \frac{I_m V_m}{J_{SC} V_{oc}} \quad (29)$$

Where  $I$  is current;  $V$  is photovoltage;  $I_s$  is the reverse saturation current[10,25];  $I_m V_m$  is the maximum power[10,15,25], and  $FF$  is the fill factor[10,25,38].

**Table S1.** Calculated maximum absorption wavelengths ( $\lambda_{max}/nm$ ), vertical excitation energy (E), oscillator strengths (f), light-harvesting efficiency (LHE), and main transition configuration of the isolated dyes in dichloromethane solution under TD-BHandH/6-31G(d,p) level.

| Dyes                        | $\lambda_{max}(nm)$ | $E_{\lambda_{max}}$<br>(eV) | f      | LHE   | Major contribs*        |
|-----------------------------|---------------------|-----------------------------|--------|-------|------------------------|
| <b><i>R<sub>d</sub></i></b> | 513.00              | 2.417                       | 1.4216 | 0.962 | H-2→L (41%), H→L (53%) |
| <b><i>Tat-1</i></b>         | 538.43              | 2.3027                      | 1.7729 | 0.983 | H-2→L (47%), H→L (41%) |
| <b><i>Tat-2</i></b>         | 594.88              | 2.8337                      | 1.5780 | 0.974 | H-2→L (44%), H→L (46%) |
| <b><i>Tat-3</i></b>         | 502.20              | 2.4688                      | 2.2094 | 0.994 | H-2→L (45%), H→L (39%) |

|              |        |        |        |       |                        |
|--------------|--------|--------|--------|-------|------------------------|
| <b>Tat-4</b> | 547.87 | 2.2630 | 1.8473 | 0.986 | H-2→L (49%), H→L (39%) |
| <b>Tat-5</b> | 559.13 | 2.9173 | 1.5809 | 0.974 | H-2→L (46%), H→L (44%) |
| <b>Tat-6</b> | 648.89 | 1.9107 | 1.1906 | 0.963 | H-2→L (43%), H→L (48%) |

\*H: HOMO; L: LUMO.

**Table S2.** Calculated transition properties and excited state lifetime of all dyes

| Dyes           | E(eV)  | Strength $f$ | $\tau_2$ (ns) |
|----------------|--------|--------------|---------------|
| R <sub>d</sub> | 1.9598 | 1.4592       | 4.12          |
| Tat-1          | 1.8675 | 1.9526       | 3.39          |
| Tat-2          | 1.6331 | 1.5830       | 5.47          |
| Tat-3          | 2.0303 | 2.4572       | 2.28          |
| Tat-4          | 1.8361 | 2.1011       | 3.25          |
| Tat-5          | 1.8110 | 1.6936       | 4.16          |
| Tat-6          | 1.3809 | 0.9698       | 12.48         |

**Table S3.** Computed charge density difference (CDD) diagram, charge transferred distance between hole and electron centroids ( $D_{CT}$ ), extent of overlap between hole and electron centroids (Sr), the length of charge transfer during electronic excitation ( $\Delta r$ ), and attracting hole-electron coulomb energy ( $E_c$ ) for the low-lying excited states of each dye.

| Systems         | Transition | Charge-spectra                                                                      | $D_{CT}(\text{Å})$ | $Sr(a.u.)$ | $\Delta r(\text{Å})$ | $E_c(\text{eV})$ |
|-----------------|------------|-------------------------------------------------------------------------------------|--------------------|------------|----------------------|------------------|
| $R_d@(TiO_2)_9$ | S0→S1      | 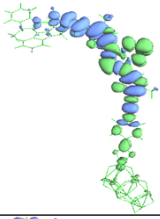   | 3.388              | 0.644      | 7.109                | 2.544            |
|                 | S0→S2      |    | 9.982              | 0.357      | 6.872                | 1.496            |
|                 | S0→S3      |    | 13.523             | 0.075      | 12.030               | 1.077            |
|                 | S0→S4      |   | 9.607              | 0.426      | 16.019               | 1.138            |
|                 | S0→S6      |  | 8.037              | 0.387      | 7.757                | 1.259            |
|                 | S0→S7      |  | 26.768             | 0.020      | 26.758               | 0.559            |
|                 | S0→S8      |  | 26.822             | 0.012      | 26.937               | 0.562            |



|                                            |        |                                                                                     |        |        |        |       |
|--------------------------------------------|--------|-------------------------------------------------------------------------------------|--------|--------|--------|-------|
|                                            | S0→S9  | 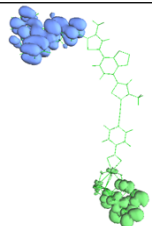   | 30.154 | 0.001  | 28.766 | 0.499 |
|                                            | S0→S10 |    | 24.789 | 0.088  | 23.733 | 0.472 |
| Tat-1@<br>(TiO <sub>2</sub> ) <sub>9</sub> | S0→S1  |    | 5.320  | 0.4583 | 9.544  | 2.213 |
|                                            | S0→S2  |   | 10.732 | 0.404  | 10.872 | 1.535 |
|                                            | S0→S3  |  | 15.268 | 0.057  | 14.091 | 0.919 |
|                                            | S0→S4  |  | 8.753  | 0.505  | 14.410 | 1.624 |
|                                            | S0→S5  |  | 8.876  | 0.451  | 10.277 | 1.521 |
|                                            | S0→S7  |  | 25.993 | 0.084  | 25.662 | 0.481 |

|                                            |        |                                                                                     |        |         |        |       |
|--------------------------------------------|--------|-------------------------------------------------------------------------------------|--------|---------|--------|-------|
|                                            | S0→S8  | 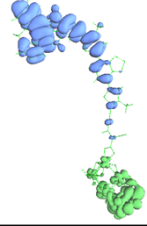   | 27.504 | 0.039   | 26.662 | 0.467 |
|                                            | S0→S9  |    | 21.554 | 0.157   | 21.691 | 0.674 |
|                                            | S0→S10 |    | 29.342 | 0.00044 | 28.030 | 0.507 |
| Tat-2@<br>(TiO <sub>2</sub> ) <sub>9</sub> | S0→S1  |   | 4.655  | 0.628   | 8.892  | 2.436 |
|                                            | S0→S2  |  | 11.997 | 0.353   | 9.181  | 1.420 |
|                                            | S0→S3  |  | 13.847 | 0.172   | 12.712 | 1.145 |
|                                            | S0→S4  |  | 8.511  | 0.468   | 15.087 | 1.368 |
|                                            | S0→S5  |  | 7.876  | 0.452   | 8.900  | 1.571 |

|                                            |        |                                                                                     |        |       |        |       |
|--------------------------------------------|--------|-------------------------------------------------------------------------------------|--------|-------|--------|-------|
|                                            | S0→S7  | 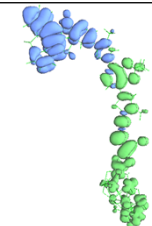   | 18.050 | 0.224 | 18.846 | 0.771 |
|                                            | S0→S8  |    | 25.678 | 0.054 | 24.714 | 0.563 |
|                                            | S0→S9  |    | 26.087 | 0.037 | 24.689 | 0.537 |
|                                            | S0→S10 |   | 18.380 | 0.037 | 21.292 | 0.780 |
| Tat-3@<br>(TiO <sub>2</sub> ) <sub>9</sub> | S0→S1  |  | 5.690  | 0.568 | 11.244 | 2.247 |
|                                            | S0→S2  |  | 13.695 | 0.339 | 12.522 | 1.253 |
|                                            | S0→S3  |  | 17.136 | 0.046 | 16.076 | 0.866 |
|                                            | S0→S4  |  | 13.749 | 0.468 | 13.936 | 1.177 |

|                                            |        |                                                                                     |        |       |        |       |
|--------------------------------------------|--------|-------------------------------------------------------------------------------------|--------|-------|--------|-------|
|                                            | S0→S6  | 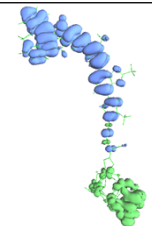   | 25.984 | 0.060 | 26.834 | 0.516 |
|                                            | S0→S7  |    | 26.588 | 0.010 | 26.834 | 0.539 |
|                                            | S0→S8  |    | 15.783 | 0.318 | 15.450 | 0.913 |
|                                            | S0→S9  |   | 29.898 | 0.001 | 28.579 | 0.500 |
|                                            | S0→S10 |  | 22.82  | 0.143 | 23.132 | 0.595 |
| Tat-4@<br>(TiO <sub>2</sub> ) <sub>9</sub> | S0→S1  |  | 4.978  | 0.612 | 9.127  | 2.363 |
|                                            | S0→S2  |  | 12.801 | 0.320 | 11.124 | 1.328 |
|                                            | S0→S3  |  | 13.877 | 0.227 | 12.444 | 1.141 |

|  |        |                                                                                     |        |       |        |       |
|--|--------|-------------------------------------------------------------------------------------|--------|-------|--------|-------|
|  | S0→S4  | 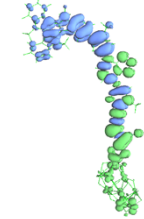   | 7.884  | 0.513 | 15.273 | 1.533 |
|  | S0→S5  |    | 9.693  | 0.435 | 10.324 | 1.384 |
|  | S0→S7  |    | 19.581 | 0.170 | 20.959 | 0.613 |
|  | S0→S8  |   | 24.986 | 0.108 | 25.234 | 0.555 |
|  | S0→S9  |  | 20.886 | 0.117 | 23.539 | 0.730 |
|  | S0→S10 |  | 27.835 | 0.048 | 26.065 | 0.491 |
|  | S0→S1  |  | 4.379  | 0.625 | 9.190  | 2.434 |
|  | S0→S2  |  | 10.363 | 0.400 | 10.249 | 1.503 |

|                                            |                                            |                                                                                     |                                                                                     |       |        |       |
|--------------------------------------------|--------------------------------------------|-------------------------------------------------------------------------------------|-------------------------------------------------------------------------------------|-------|--------|-------|
| Tat-5@<br>(TiO <sub>2</sub> ) <sub>9</sub> | S0→S3                                      | 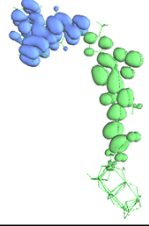   | 14.177                                                                              | 0.064 | 13.677 | 1.024 |
|                                            | S0→S4                                      |    | 9.354                                                                               | 0.469 | 14.887 | 1.481 |
|                                            | S0→S5                                      |    | 8.984                                                                               | 0.411 | 9.084  | 1.364 |
|                                            | S0→S7                                      |   | 18.242                                                                              | 0.177 | 19.145 | 0.745 |
|                                            | S0→S8                                      |  | 26.757                                                                              | 0.014 | 26.500 | 0.572 |
|                                            | S0→S9                                      |  | 26.450                                                                              | 0.042 | 24.919 | 0.508 |
|                                            | S0→S10                                     |  | 17.415                                                                              | 0.033 | 21.183 | 0.910 |
|                                            | Tat-6@<br>(TiO <sub>2</sub> ) <sub>9</sub> | S0→S1                                                                               |  | 4.033 | 0.626  | 7.837 |

|        |                                                                                     |        |       |        |       |
|--------|-------------------------------------------------------------------------------------|--------|-------|--------|-------|
| S0→S2  | 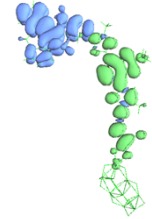   | 12.455 | 0.294 | 8.219  | 1.310 |
| S0→S3  |    | 13.091 | 0.172 | 11.785 | 1.246 |
| S0→S4  |    | 7.734  | 0.476 | 16.862 | 1.623 |
| S0→S5  |   | 6.678  | 0.463 | 7.161  | 1.622 |
| S0→S6  |  | 2.539  | 0.506 | 5.606  | 2.579 |
| S0→S7  |  | 3.189  | 0.414 | 6.324  | 2.642 |
| S0→S8  |  | 16.861 | 0.163 | 17.800 | 0.749 |
| S0→S10 |  | 17.636 | 0.026 | 21.488 | 0.899 |

**Table S4.** The calculated driving force for electrons injection and reorganization energies. (in eV).

| Dyes  | $E_{LUMO}$ | $E_{CBM}$ | $\Delta G^0$ | $\lambda_{total}$ |
|-------|------------|-----------|--------------|-------------------|
| $R_d$ | -2.804     | -3.231    | 0.427        | 0.178             |
| Tat-1 | -3.141     | -3.231    | 0.09         | 0.197             |
| Tat-2 | -3.246     | -3.231    | 0.015        | 0.200             |
| Tat-3 | -3.000     | -3.231    | 0.231        | 0.203             |
| Tat-4 | -3.230     | -3.231    | 0.001        | 0.207             |
| Tat-5 | -3.158     | -3.231    | 0.073        | 0.189             |
| Tat-6 | -3.353     | -3.231    | 0.122        | 0.225             |

**Table S5.** The comparison for photovoltaic data of  $R_d$  between experiment and theory.

| R          | $J_{SC}(\text{mA cm}^{-2})$ | $V_{OC}(\text{V})$ | FF    | PCE       | Absorption (nm) |
|------------|-----------------------------|--------------------|-------|-----------|-----------------|
| Experiment | 19.74                       | 0.957              | 0.708 | 13.4%[39] | 519             |
| Theory     | 19.21                       | 0.838              | 0.865 | 13.92%    | 513.83          |
| $ \Delta $ | 0.53                        | 0.119              | 0.157 | 0.52%     | 5.17            |



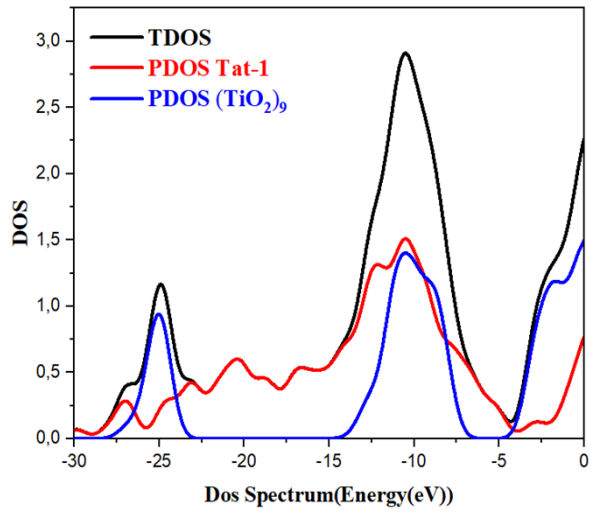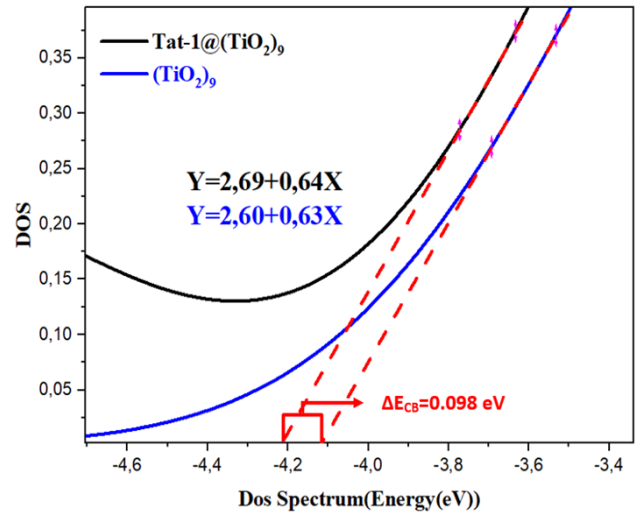

(a)

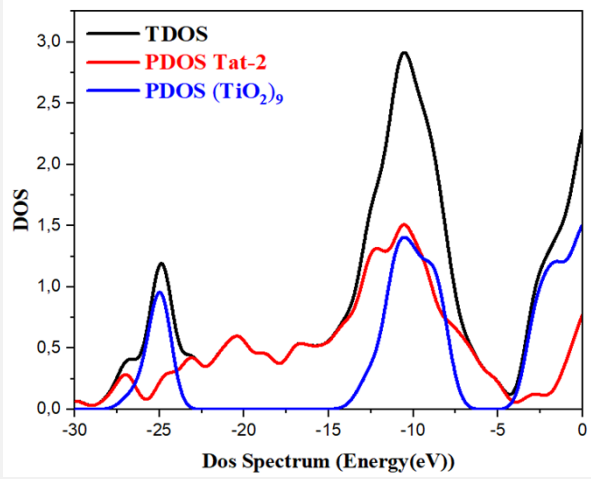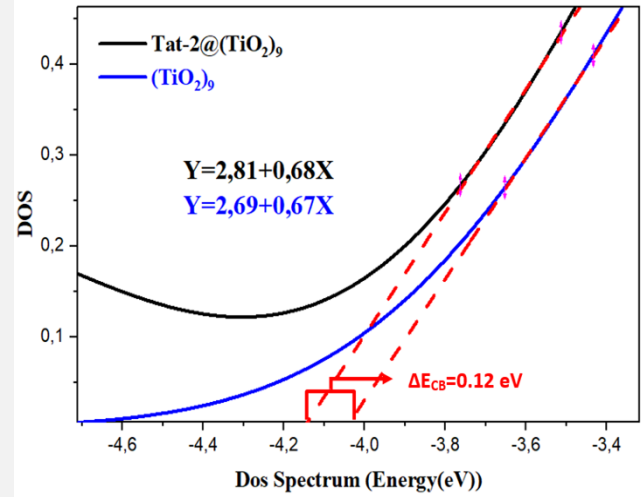

(b)

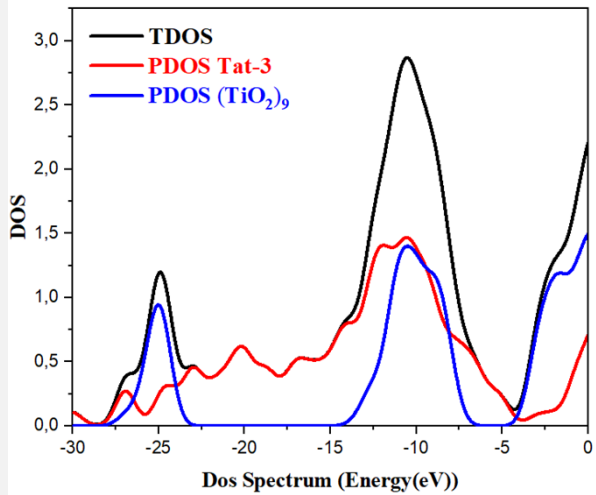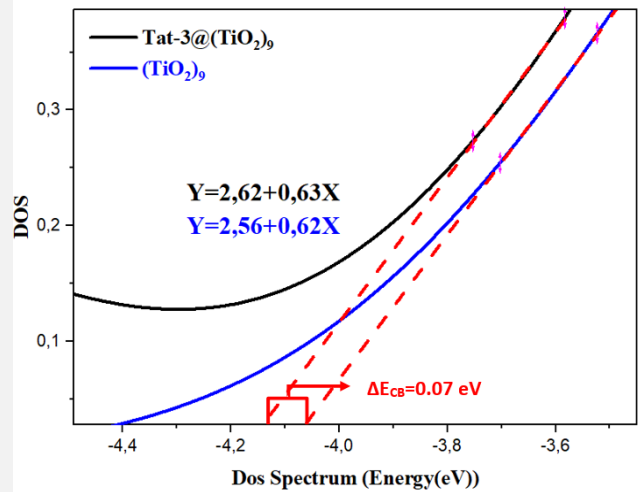

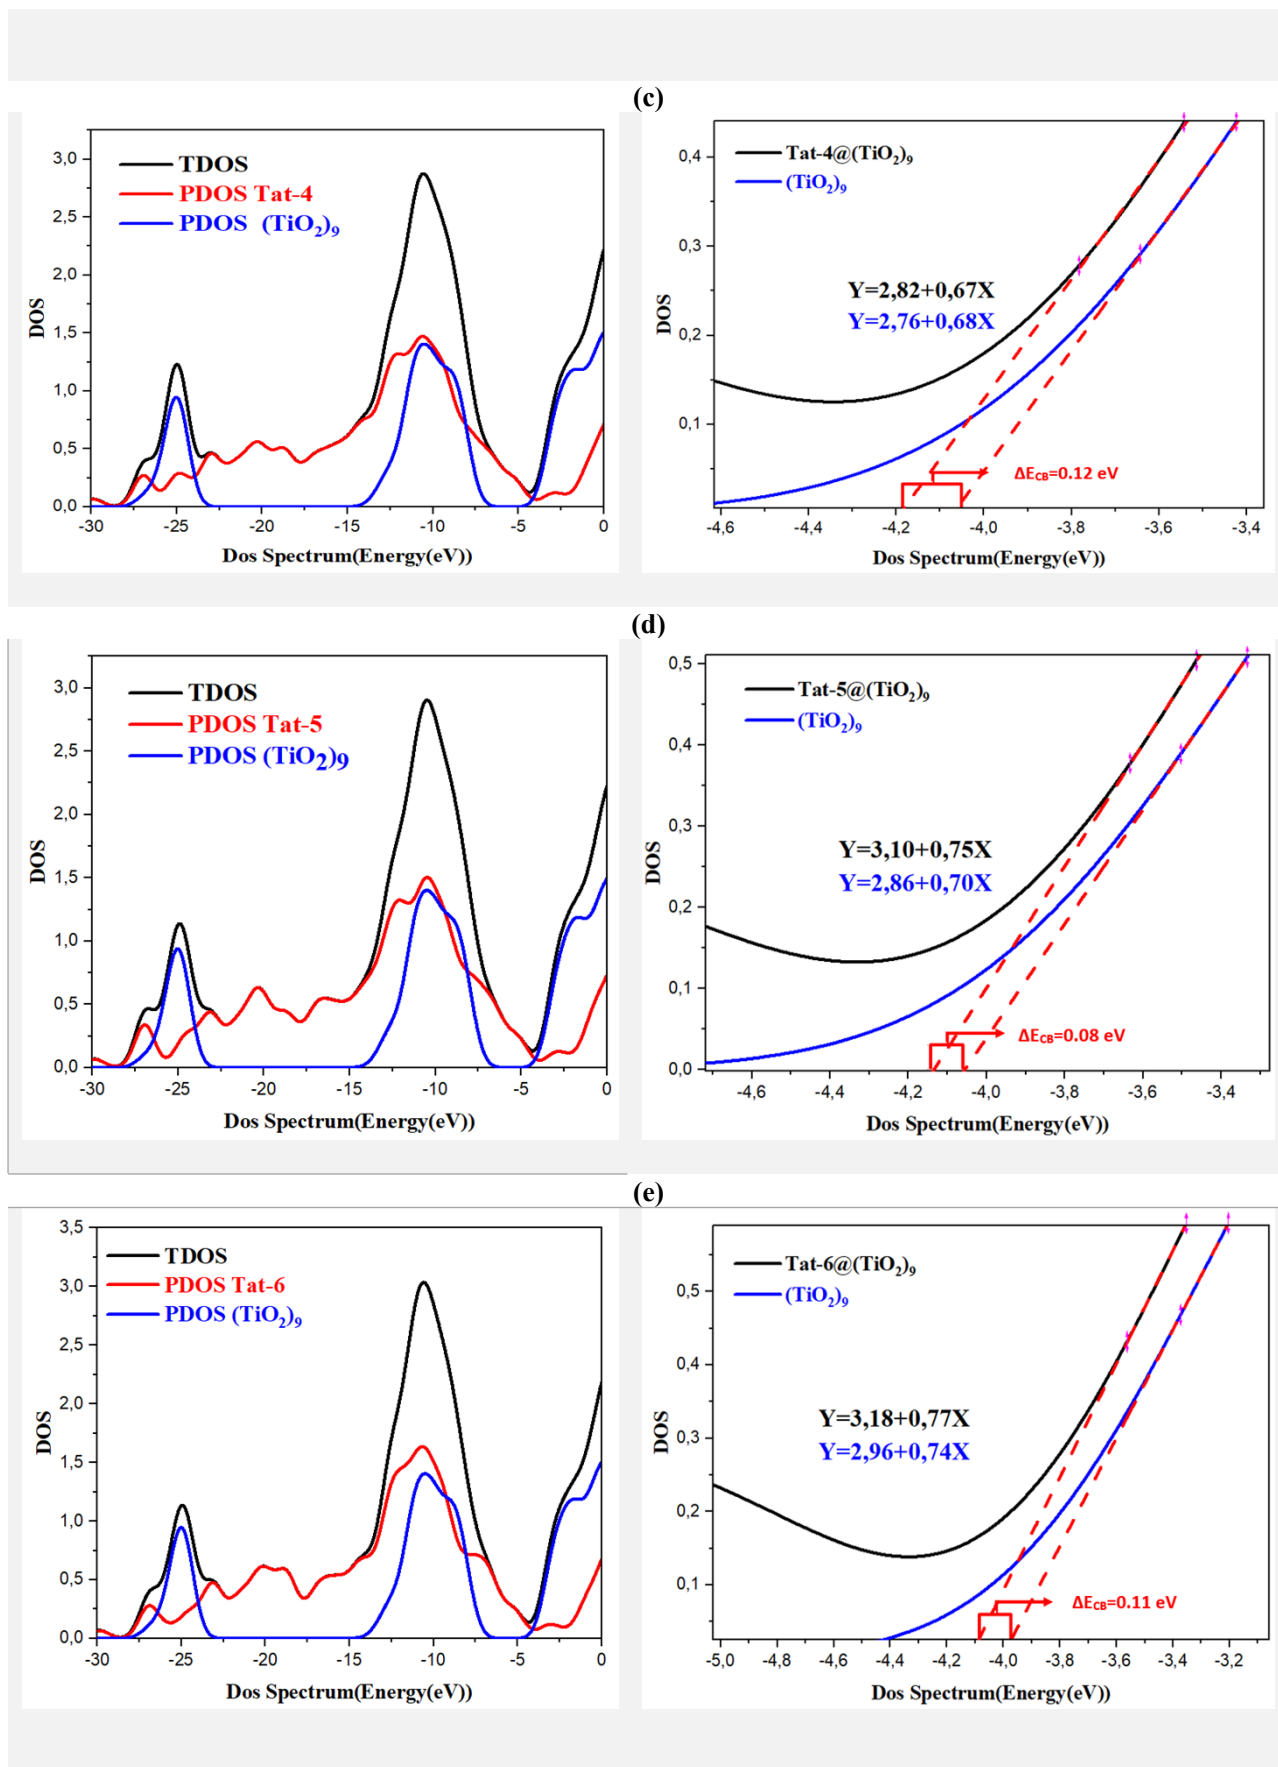

**Figure S1.** The calculated shift of conduction band ( $\Delta E_{CB}$ ) of simulated Dye@ $(TiO_2)_9$

composites. (a) presents the  $\Delta E_{CB}$  of Tat-1; (b) presents the  $\Delta E_{CB}$  of Tat-2; (c) presents the  $\Delta E_{CB}$  of Tat-3; (d) presents the  $\Delta E_{CB}$  of Tat-4; (e) presents the  $\Delta E_{CB}$  of Tat-5; (f) presents the  $\Delta E_{CB}$  of Tat-6.

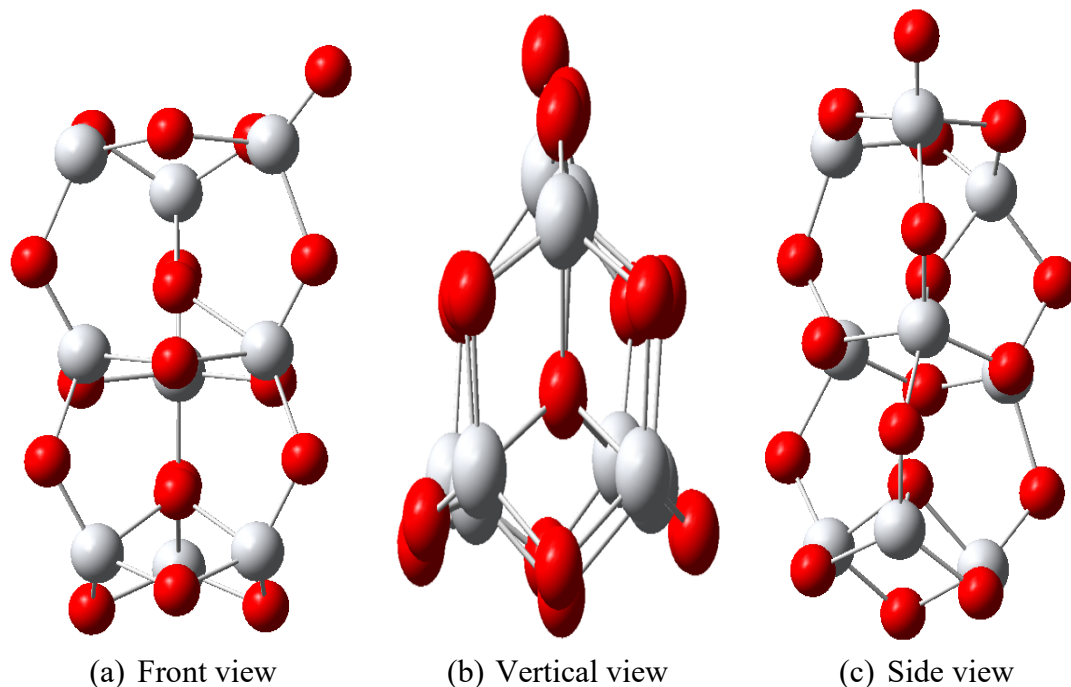

**Figure S2.** The geometry structure of optimized  $TiO_2$  cluster. (a) The front view of the optimized structure. (b) The vertical view of the optimized structure. (c) The side view of the optimized structure.

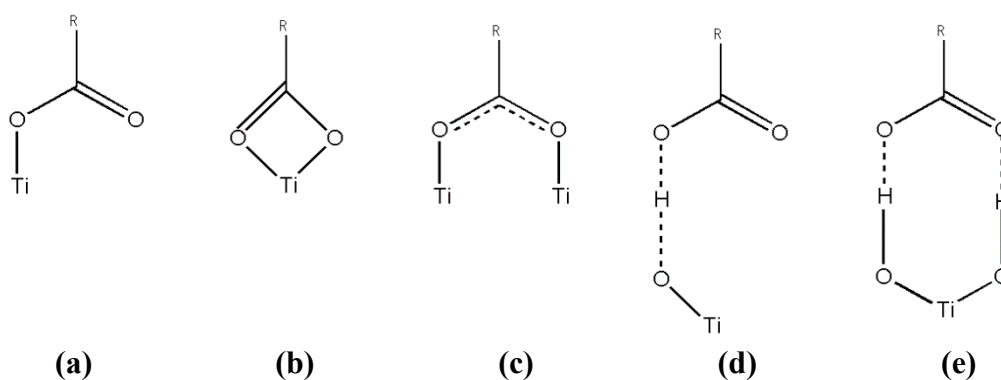

**Figure S3.** The connection model of carboxylic acid R-COOH group on  $TiO_2$  clusters. (a) The connection model of monodentate ester. (b) The connection model of bidentate cheating (c) The connection model of bidentate bridging (d) The connection model of monodentate H-bonding (e) The connection model of bidentate H-bonding

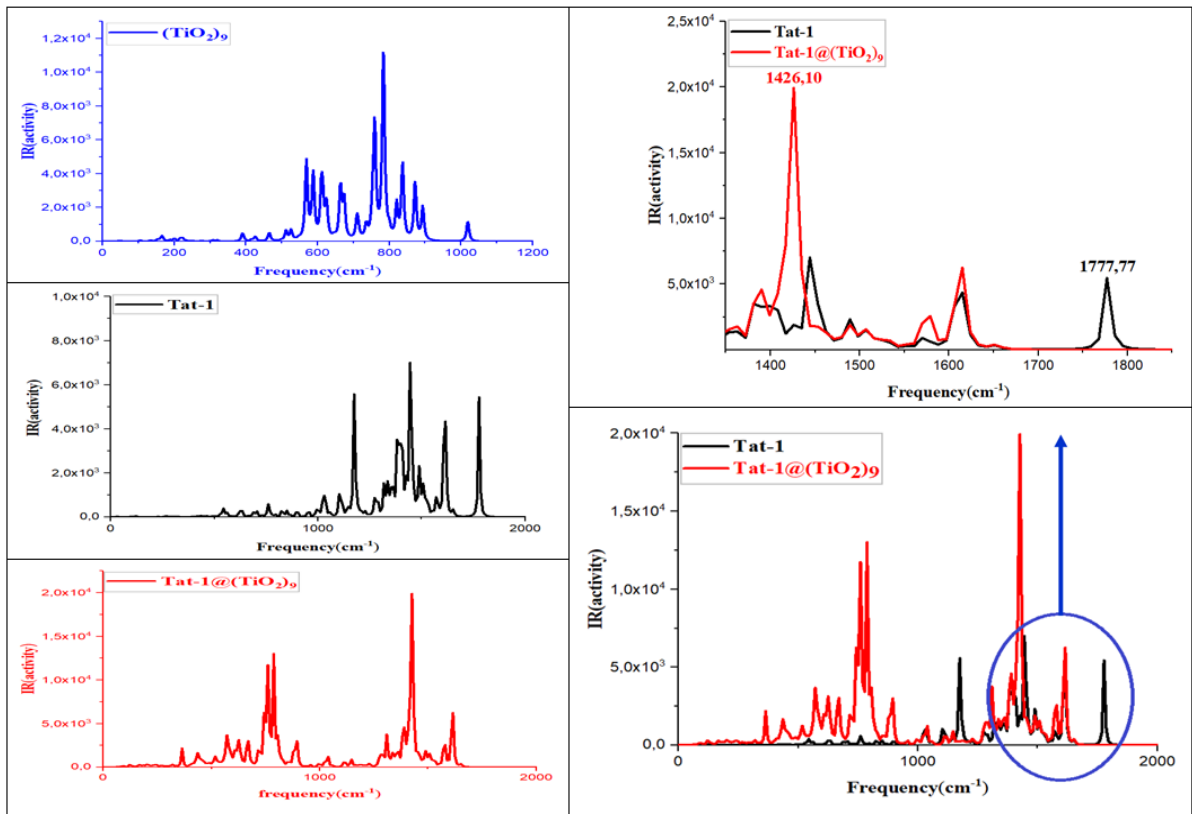

(a)

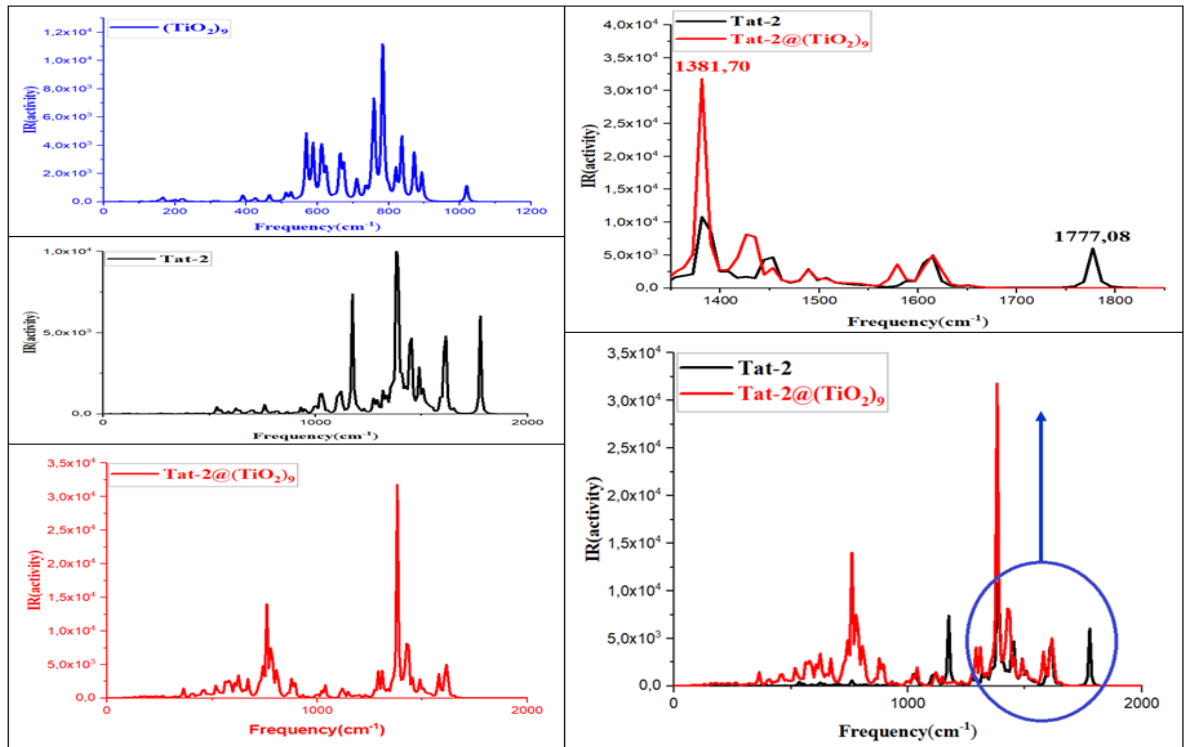

(b)

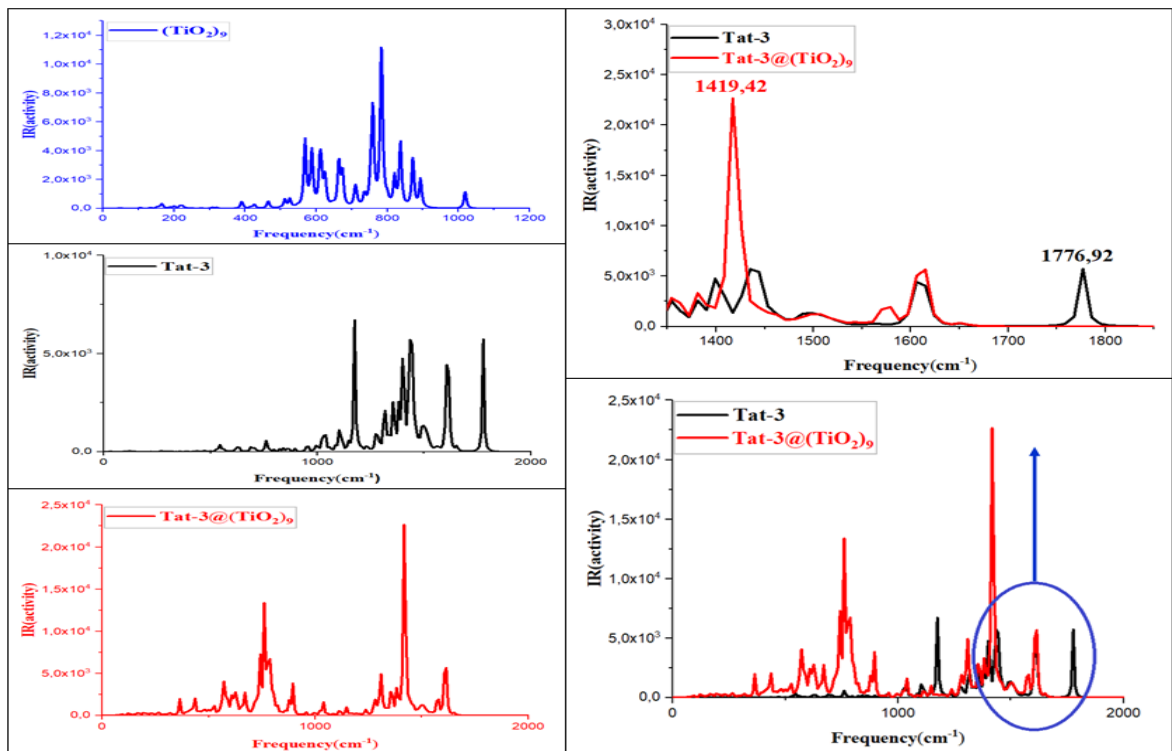

(c)

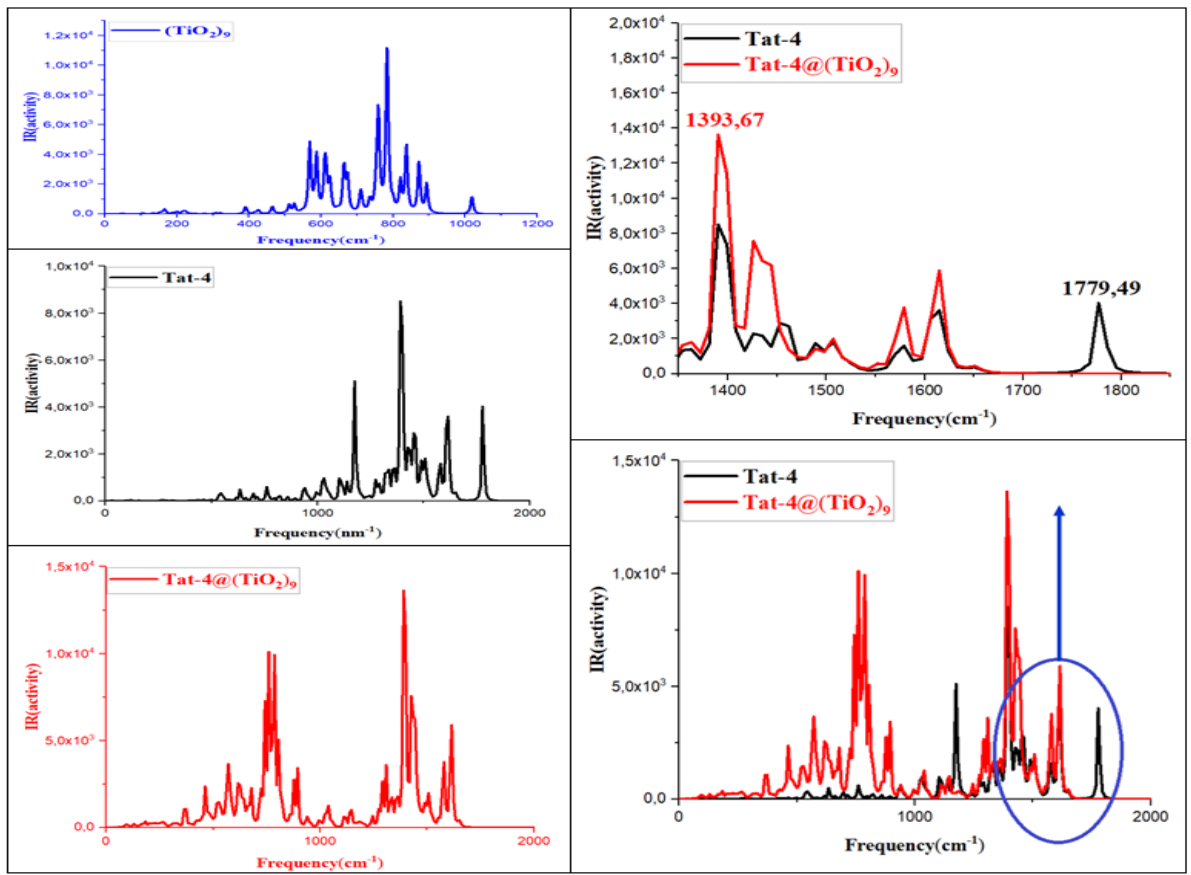

(d)

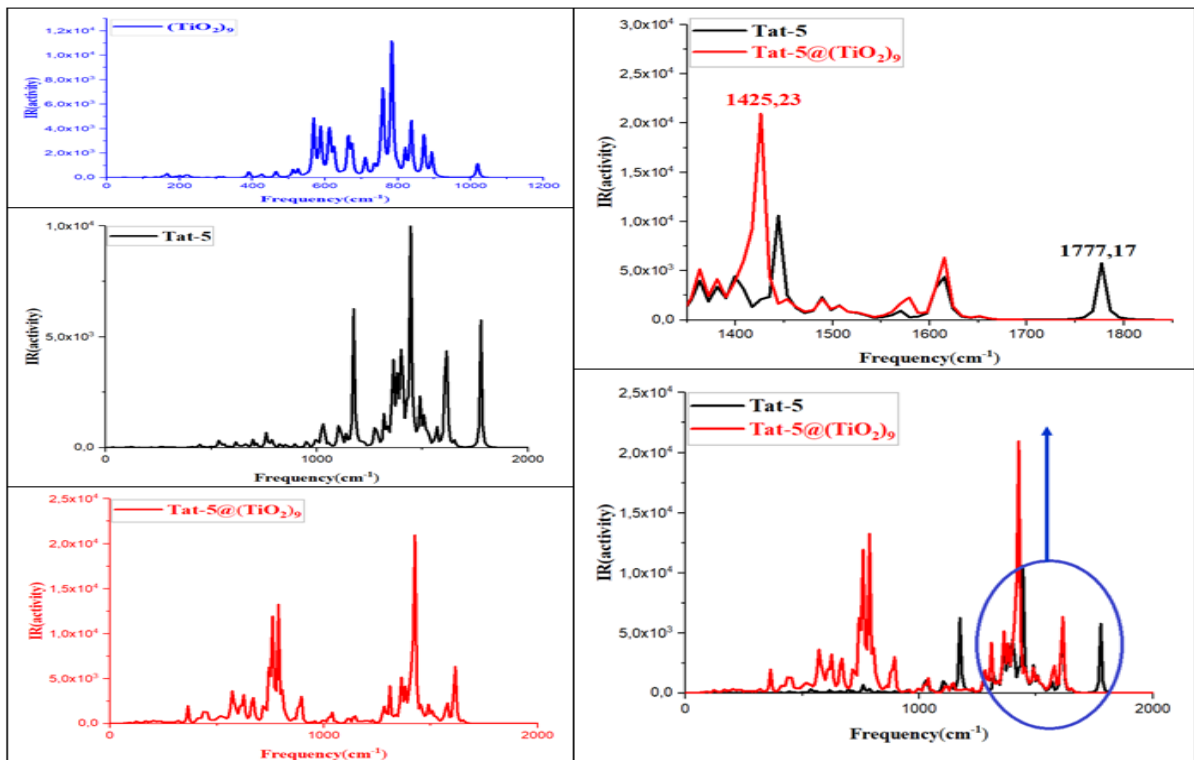

(e)

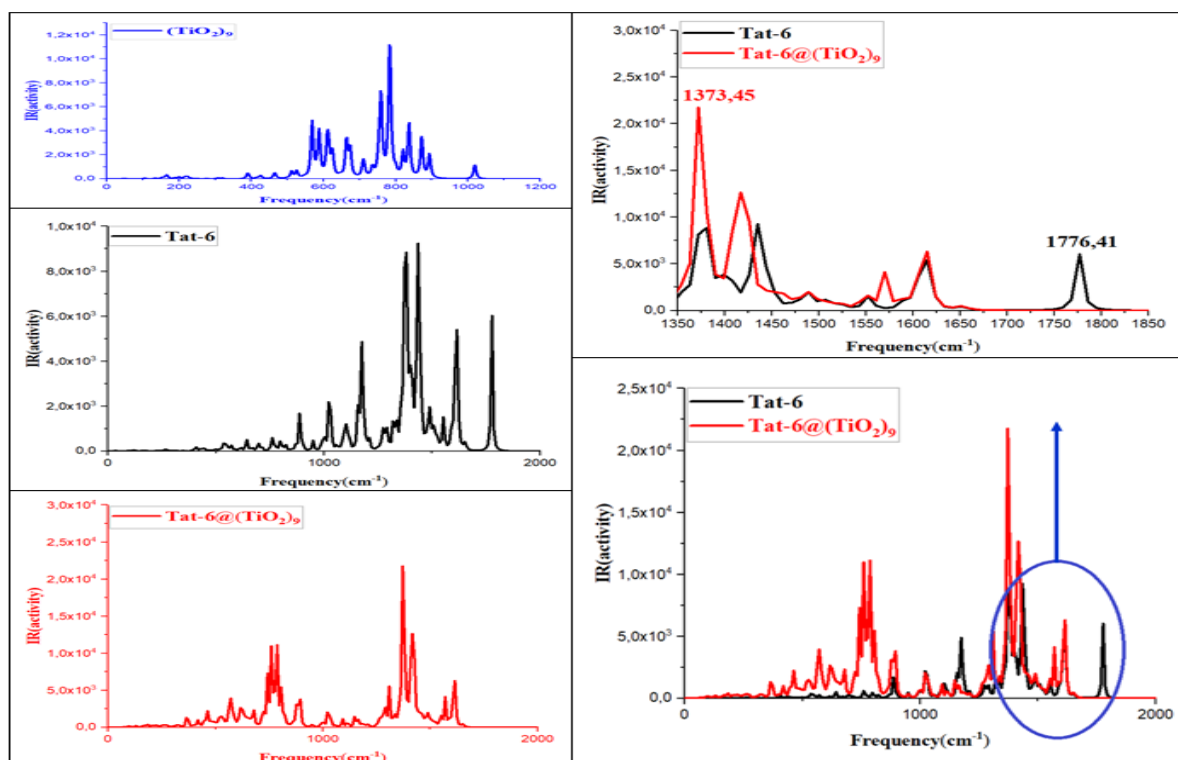

(f)

**Figure S4.** The FT-IR spectrum of isolated  $TiO_2$  (in blue color), dye (in black color) Dye/ $(TiO_2)_9$  composites (in red color). (a) The black color presents the dye of Tat-1; The red color presents Tat-1@ $(TiO_2)_9$  composites; (b) The black color presents the dye of Tat-2; The red color presents Tat-2@ $(TiO_2)_9$  composites; (c) The black color presents dye of Tat-3; The red color presents Tat-3@ $(TiO_2)_9$  composites; (d) The black color presents dye of Tat-4; The red color presents Tat-4@ $(TiO_2)_9$  composites; (e) The black color presents dye of Tat-5; The red color presents Tat-5@ $(TiO_2)_9$  composites; (f) The black color presents dye of Tat-6; The red color presents Tat-6@ $(TiO_2)_9$  composites.

## Reference

- [1] B.A. Gregg, Excitonic solar cells, *J. Phys. Chem. B.* 107 (2003) 4688–4698.
- [2] P. Politzer, F. Abu-Awwad, A comparative analysis of Hartree-Fock and Kohn-Sham orbital energies, (n.d.) 5.
- [3] J. Muscat, D. Newns, Chemisorption on metals, *Prog. Surf. Sci.* 9 (1978) 1–43.
- [4] P. Persson, M.J. Lundqvist, R. Ernstorfer, W. Goddard, F. Willig, Quantum chemical calculations of the influence of anchor-cum-spacer groups on femtosecond electron transfer times in dye-sensitized semiconductor nanocrystals, *J. Chem. Theory Comput.* 2 (2006) 441–451.
- [5] J. Calbo, M. Pastore, E. Mosconi, E. Ortí, F. De Angelis, Computational modeling of single-versus double-anchoring modes in di-branched organic sensitizers on  $TiO_2$  surfaces: structural and electronic properties, *Phys. Chem. Chem. Phys.* 16 (2014) 4709–4719.

- [6] S. Belviso, E. Santoro, M. Penconi, S. Righetto, F. Tessore, Thioethyl porphyrazines: Attractive chromophores for second-order nonlinear optics and DSSCs, *J. Phys. Chem. C.* 123 (2019) 13074–13082.
- [7] X. Wang, Y. Li, P. Song, F. Ma, Y. Yang, Effect of graphene between photoanode and sensitizer on the intramolecular and intermolecular electron transfer process, *Phys. Chem. Chem. Phys.* 22 (2020) 6391–6400.
- [8] M. Li, L. Kou, L. Diao, Q. Zhang, Z. Li, Q. Wu, W. Lu, D. Pan, Z. Wei, Theoretical study of WS-9-based organic sensitizers for unusual Vis/NIR absorption and highly efficient dye-sensitized solar cells, *J. Phys. Chem. C.* 119 (2015) 9782–9790.
- [9] T. Le Bahers, T. Pauporté, G. Scalmani, C. Adamo, I. Ciofini, A TD-DFT investigation of ground and excited state properties in indoline dyes used for dye-sensitized solar cells, *Phys. Chem. Chem. Phys.* 11 (2009) 11276–11284.
- [10] P. Ren, C. Sun, Y. Shi, P. Song, Y. Yang, Y. Li, Global performance evaluation of solar cells using two models: from charge-transfer and recombination mechanisms to photoelectric properties, *J. Mater. Chem. C.* 7 (2019) 1934–1947.
- [11] T. Le Bahers, C. Adamo, I. Ciofini, A Qualitative Index of Spatial Extent in Charge-Transfer Excitations, *J. Chem. Theory Comput.* 7 (2011) 2498–2506. <https://doi.org/10.1021/ct200308m>.
- [12] C.A. Guido, P. Cortona, B. Mennucci, C. Adamo, On the Metric of Charge Transfer Molecular Excitations: A Simple Chemical Descriptor, *J. Chem. Theory Comput.* 9 (2013) 3118–3126. <https://doi.org/10.1021/ct400337e>.
- [13] F. Gao, C.-L. Yang, M.-S. Wang, X.-G. Ma, W.-W. Liu, Theoretical insight on hybrid nanocomposites of graphene quantum dot and carbazole–carbazole dyes as an efficient sensitizer of DSSC, *Spectrochim. Acta. A. Mol. Biomol. Spectrosc.* 216 (2019) 69–75. <https://doi.org/10.1016/j.saa.2019.02.107>.
- [14] T.-F. Lu, W. Li, F.-Q. Bai, R. Jia, J. Chen, H.-X. Zhang, Anionic ancillary ligands in cyclometalated Ru (II) complex sensitizers improve photovoltaic efficiency of dye-sensitized solar cells: insights from theoretical investigations, *J. Mater. Chem. A.* 5 (2017) 15567–15577.
- [15] M. Grätzel, Solar energy conversion by dye-sensitized photovoltaic cells, *Inorg. Chem.* 44 (2005) 6841–6851.
- [16] X. Liu, J. Han, H. Zhao, H. Yan, Y. Shi, M. Jin, C. Liu, D. Ding, Pressure dependence of excited-state charge-carrier dynamics in organolead tribromide perovskites, *Appl. Phys. Lett.* 112 (2018) 191903.
- [17] C. Yang, P. Song, R.M. El-Shishtawy, F. Ma, Y. Li, Photovoltaic performance and power conversion efficiency prediction of double fence porphyrins, *Phys. Chem. Chem. Phys.* 23 (2021) 27042–27058.
- [18] D. Zhao, R.M. Saputra, P. Song, Y. Yang, Y. Li, How graphene strengthened molecular photoelectric performance of solar cells: A photo current-voltage assessment, *Sol. Energy.* 213 (2021) 271–283. <https://doi.org/10.1016/j.solener.2020.11.034>.
- [19] X. Shi, Y. Yang, L. Wang, Y. Li, Introducing Asymmetry Induced by Benzene Substitution in a Rigid Fused  $\pi$  Spacer of D- $\pi$ -A-Type Solar Cells: A Computational Investigation, *J. Phys. Chem. C.* 123 (2019) 4007–4021. <https://doi.org/10.1021/acs.jpcc.8b10963>.
- [20] M.K. Nazeeruddin, A. Kay, I. Rodicio, R. Humphry-Baker, E. Müller, P. Liska, N. Vlachopoulos, M. Grätzel, Conversion of light to electricity by cis-X2bis (2, 2'-bipyridyl-4, 4'-dicarboxylate) ruthenium (II) charge-transfer sensitizers (X= Cl-, Br-, I-, CN-, and SCN-) on nanocrystalline titanium dioxide electrodes, *J. Am. Chem. Soc.* 115 (1993) 6382–6390.
- [21] W. Zhang, L. Wang, L. Mao, J. Jiang, H. Ren, P. Heng, H. Ågren, J. Zhang, Computational protocol for precise prediction of dye-sensitized solar cell performance, *J. Phys. Chem. C.* 124 (2020) 3980–3987.
- [22] K. Prakash, A.Z. Alsaleh, P. Rath, A. Sharma, M. Sankar, F. D'Souza, Synthesis, Spectral, Electrochemical and Photovoltaic Studies of A3B Porphyrinic Dyes having Peripheral Donors, *ChemPhysChem.* 20 (2019) 2627–2634.
- [23] P. Heng, B. An, H. Ren, Y. Hu, X. Guo, L. Mao, L. Wang, J. Zhang, Influence of Different Molecular Design Strategies on Photovoltaic Properties of a Series of Triphenylamine-Based Organic Dyes for Dye-Sensitized Solar Cells: Insights from Theoretical Investigations, *J. Phys. Chem. C.* 124 (2020) 15036–15044.
- [24] D. Zhao, R.M. Saputra, P. Song, Y. Yang, F. Ma, Y. Li, Enhanced photoelectric and photocatalysis performances of quinacridone derivatives by forming D- $\pi$ -A structure, *Sol. Energy.* 201 (2020) 872–883. <https://doi.org/10.1016/j.solener.2020.03.053>.



- [25] W. Ma, Y. Jiao, S. Meng, Predicting energy conversion efficiency of dye solar cells from first principles, *J. Phys. Chem. C*. 118 (2014) 16447–16457.
- [26] N.J. Cherepy, G.P. Smestad, M. Grätzel, J.Z. Zhang, Ultrafast electron injection: implications for a photoelectrochemical cell utilizing an anthocyanin dye-sensitized TiO<sub>2</sub> nanocrystalline electrode, *J. Phys. Chem. B*. 101 (1997) 9342–9351.
- [27] R. Marcus, Theory of electron-transfer reaction rates of solvated electrons, *J. Chem. Phys.* 43 (1965) 3477–3489.
- [28] P. Heng, L. Mao, X. Guo, L. Wang, J. Zhang, Accurate estimation of the photoelectric conversion efficiency of a series of anthracene-based organic dyes for dye-sensitized solar cells, *J. Mater. Chem. C*. 8 (2020) 2388–2399.
- [29] Z. Ning, Y. Fu, H. Tian, Improvement of dye-sensitized solar cells: what we know and what we need to know, *Energy Environ. Sci.* 3 (2010) 1170. <https://doi.org/10.1039/c003841e>.
- [30] T. Marinado, K. Nonomura, J. Nissfolk, Martin.K. Karlsson, D.P. Hagberg, L. Sun, S. Mori, A. Hagfeldt, How the Nature of Triphenylamine-Polyene Dyes in Dye-Sensitized Solar Cells Affects the Open-Circuit Voltage and Electron Lifetimes, *Langmuir*. 26 (2010) 2592–2598. <https://doi.org/10.1021/la902897z>.
- [31] T. Marinado, D.P. Hagberg, M. Hedlund, T. Edvinsson, E.M.J. Johansson, G. Boschloo, H. Rensmo, T. Brinck, L. Sun, A. Hagfeldt, Rhodaninedyes for dye-sensitized solar cells : spectroscopy, energy levels and photovoltaic performance, *Phys Chem Chem Phys*. 11 (2009) 133–141. <https://doi.org/10.1039/B812154K>.
- [32] E. Ronca, M. Pastore, L. Belpassi, F. Tarantelli, F. De Angelis, Influence of the dye molecular structure on the TiO<sub>2</sub> conduction band in dye-sensitized solar cells: disentangling charge transfer and electrostatic effects, *Energy Environ. Sci.* 6 (2013) 183–193.
- [33] S. Yusuf, A. Azzahari, V. Selvanathan, R. Yahya, M. Careem, A.K. Arof, Improvement of N-phthaloylchitosan based gel polymer electrolyte in dye-sensitized solar cells using a binary salt system, *Carbohydr. Polym.* 157 (2017) 938–944.
- [34] W. Li, J. Wang, J. Chen, F.-Q. Bai, H.-X. Zhang, Theoretical investigation and design of high-efficiency dithiafulvenyl-based sensitizers for dye-sensitized solar cells: the impacts of elongating  $\pi$ -spacers and rigidifying dithiophene, *Phys. Chem. Chem. Phys.* 16 (2014) 9458–9468.
- [35] P. Li, Y. Cui, C. Song, H. Zhang, A systematic study of phenoxazine-based organic sensitizers for solar cells, *Dyes Pigments*. 137 (2017) 12–23.
- [36] U. Sultan, F. Ahmadloo, G. Cha, B. Gökcan, S. Hejazi, J.-E. Yoo, N.T. Nguyen, M. Altomare, P. Schmuki, M.S. Killian, A High-Field Anodic NiO Nanosponge with Tunable Thickness for Application in p-Type Dye-Sensitized Solar Cells, *ACS Appl. Energy Mater.* 3 (2020) 7865–7872.
- [37] J.K. Roy, S. Kar, J. Leszczynski, Revealing the photophysical mechanism of N, N'-Diphenyl-aniline based sensitizers with the D–D– $\pi$ –A framework: theoretical insights, *ACS Sustain. Chem. Eng.* 8 (2020) 13328–13341.
- [38] I.-Y. Jeon, H.M. Kim, D.H. Kweon, S.-M. Jung, J.-M. Seo, S.-H. Shin, I.T. Choi, Y.K. Eom, S.H. Kang, H.K. Kim, Metalloid tellurium-doped graphene nanoplatelets as ultimately stable electrocatalysts for cobalt reduction reaction in dye-sensitized solar cells, *Nano Energy*. 30 (2016) 867–876.
- [39] L. Zhang, X. Yang, S. Li, Z. Yu, A. Hagfeldt, L. Sun, Electron-Withdrawing Anchor Group of Sensitizer for Dye-Sensitized Solar Cells, Cyanoacrylic Acid, or Benzoic Acid?, *Sol. RRL*. 4 (2020) 1900436. <https://doi.org/10.1002/solr.201900436>.
